# Supplementary material
Source: ML conference proceedings conference paper supplement (https://openreview.net/forum?id=X0vPof5DVh)

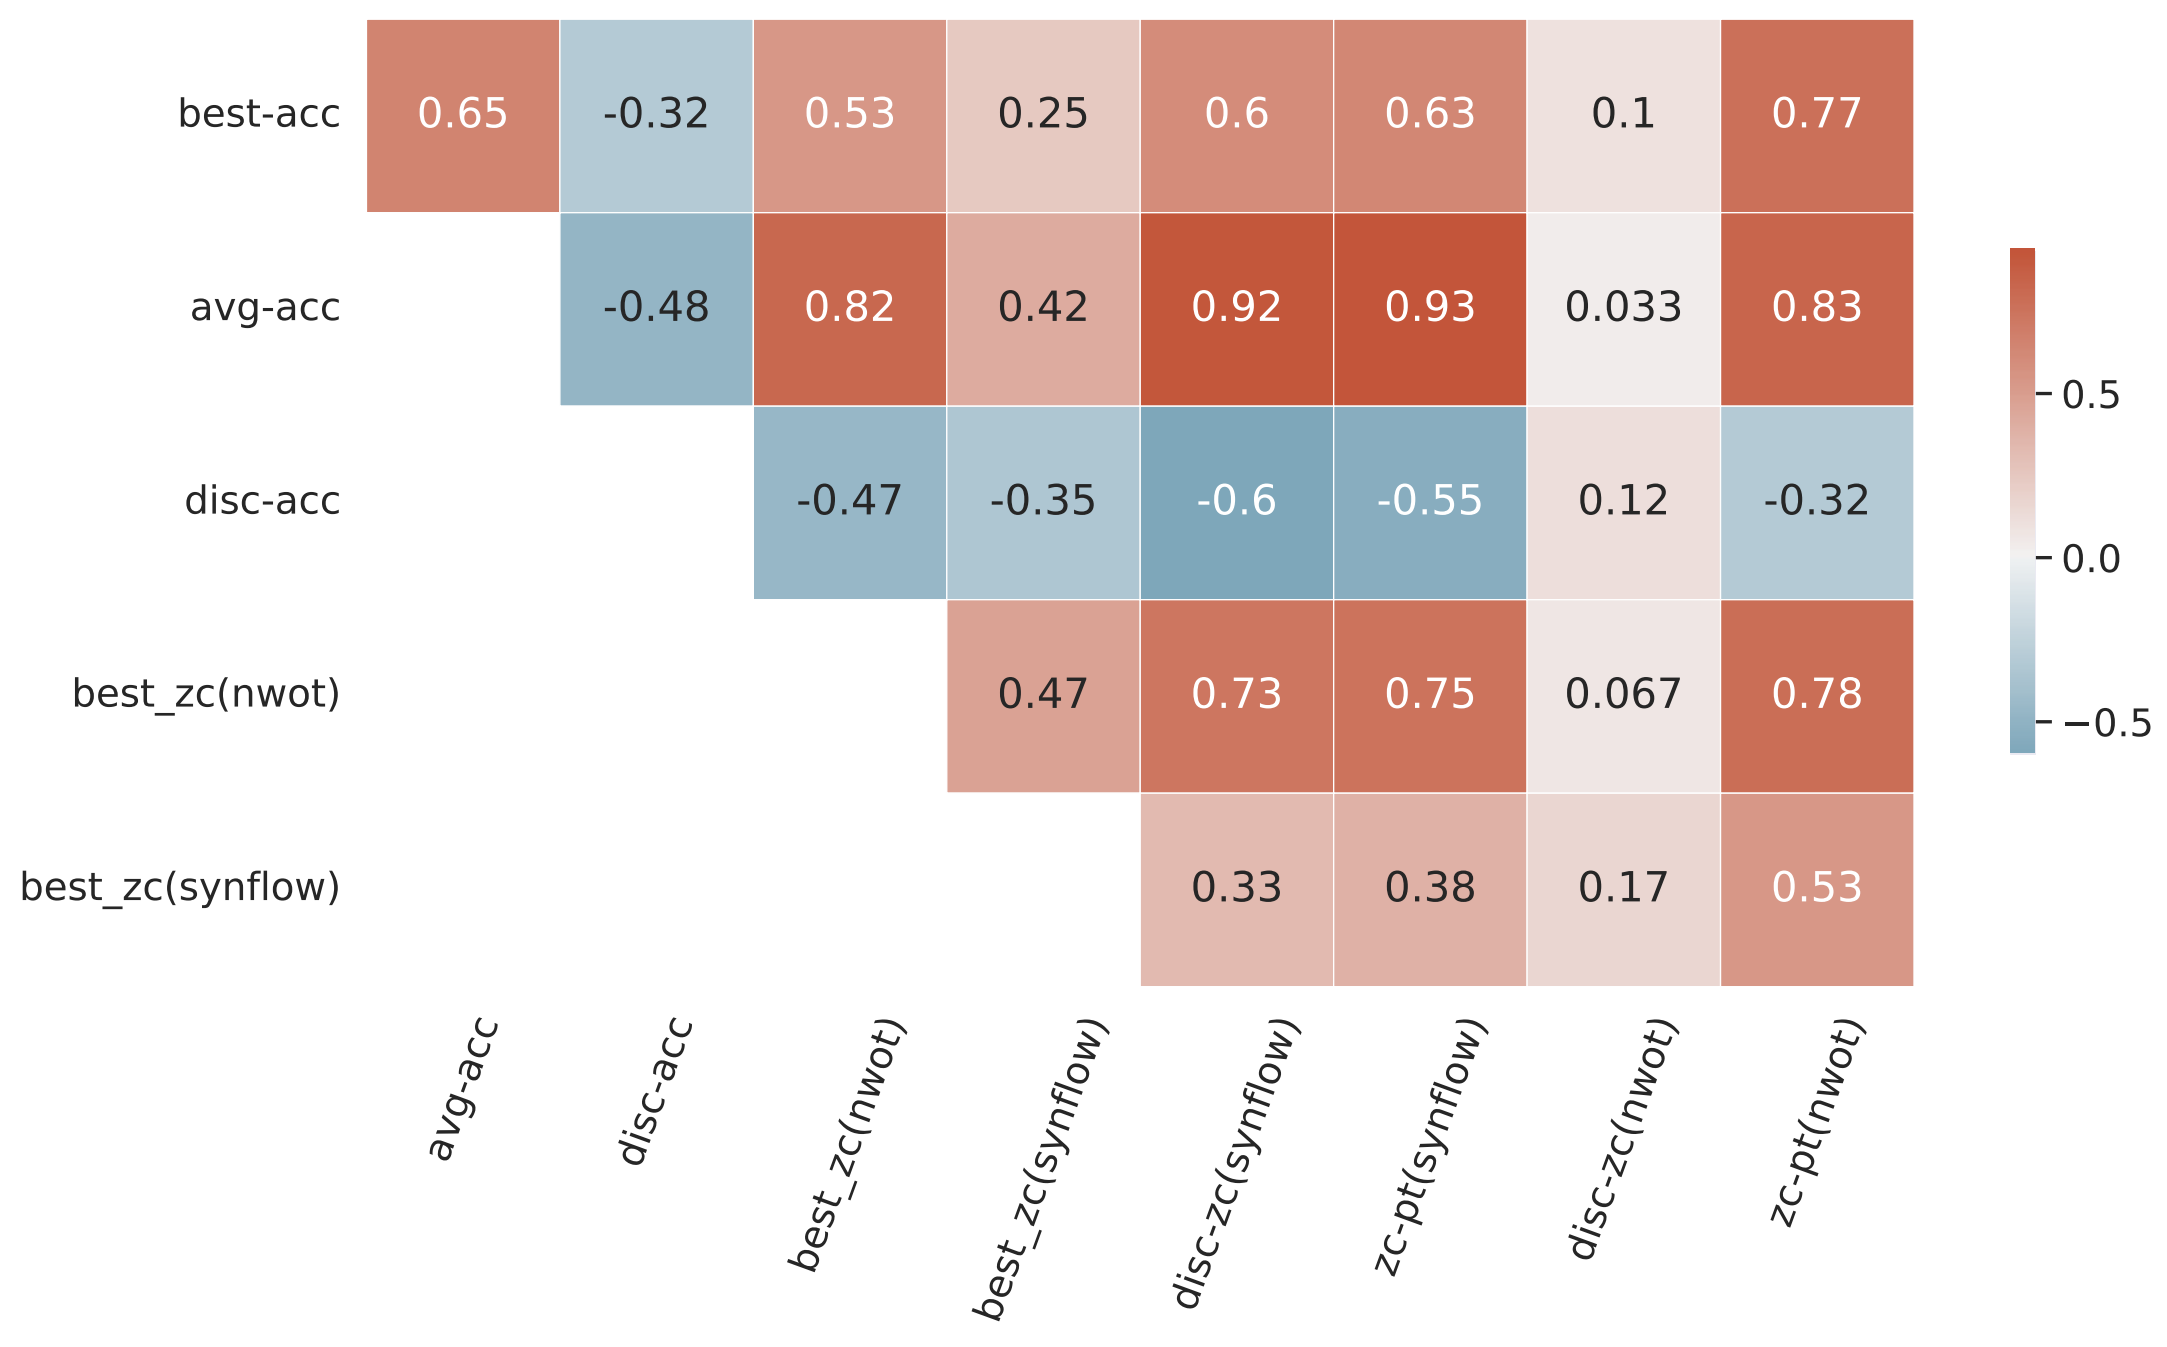

Supplement: supplementary_material [file metric_correlation.pdf › code/NASBench201/notebooks_201/metric_correlation.pdf]

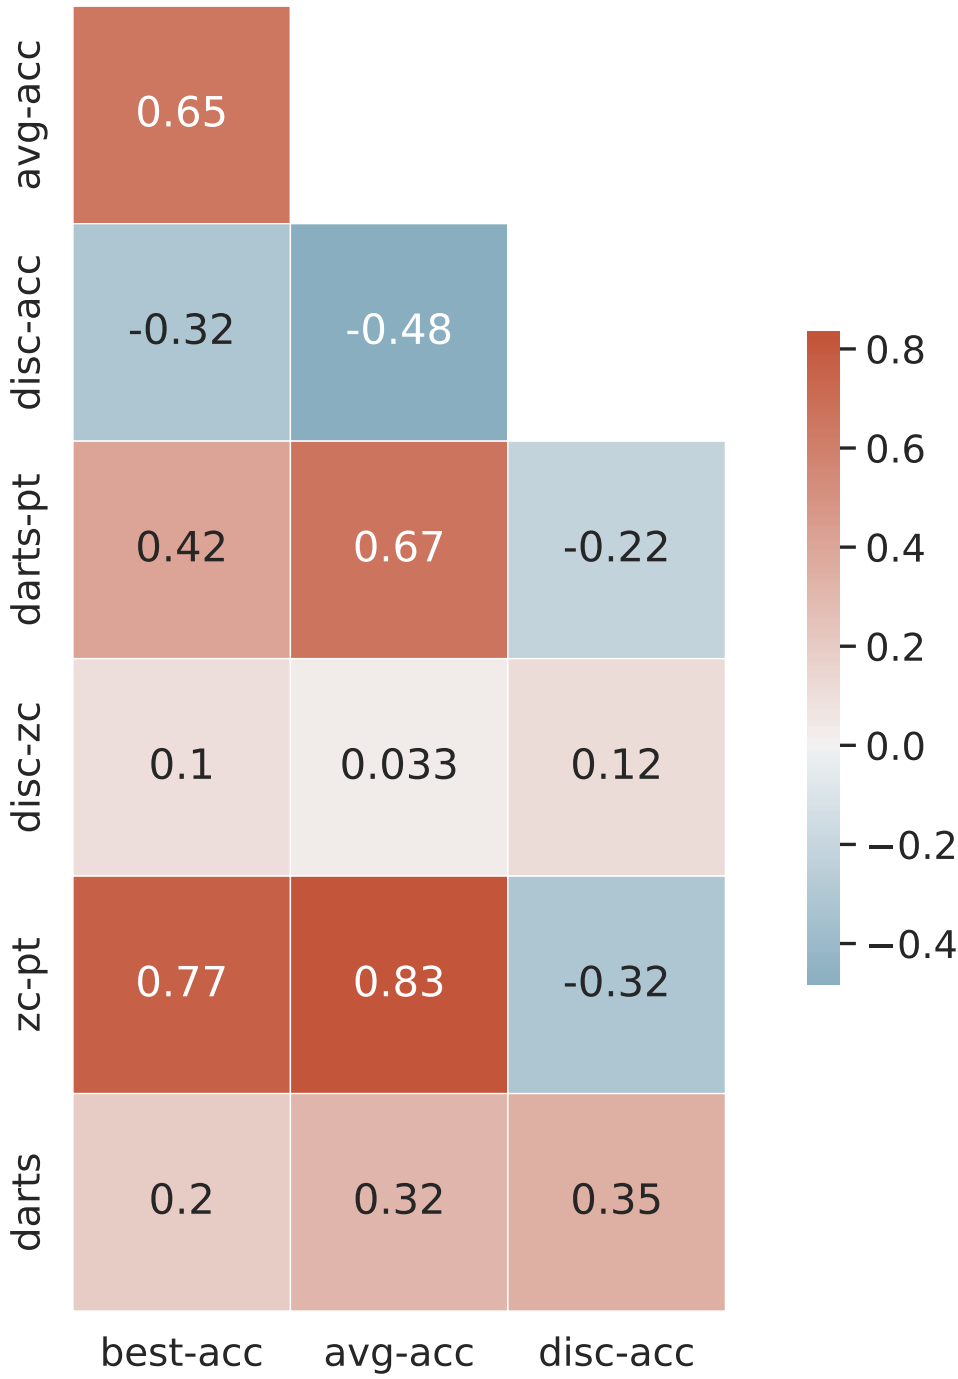

Supplement: supplementary_material [file metric_correlation_vert.pdf › code/NASBench201/notebooks_201/metric_correlation_vert.pdf]

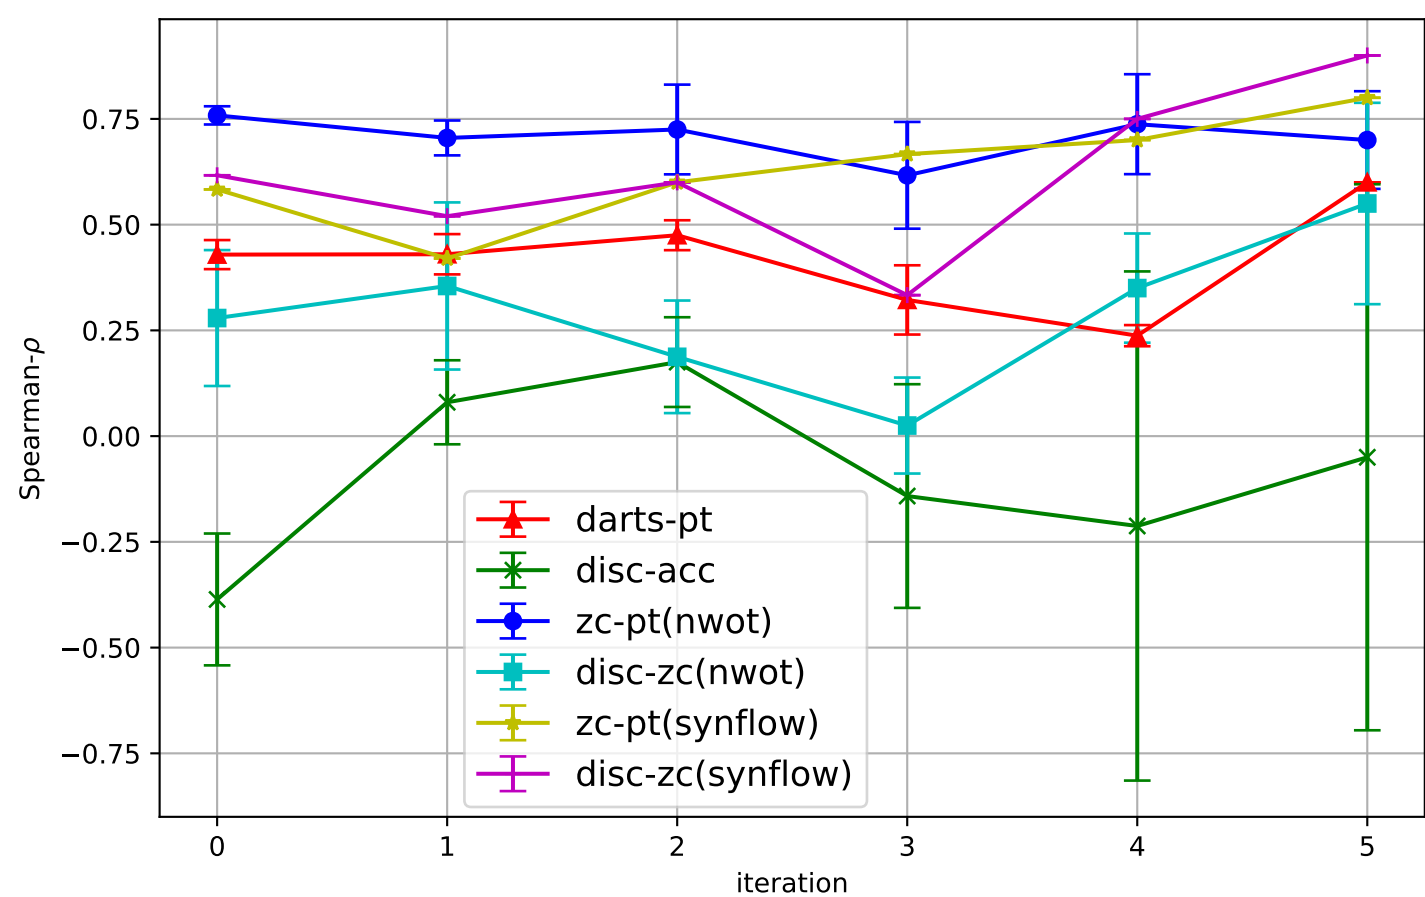

Supplement: supplementary_material [file op_correl_time.pdf › code/NASBench201/notebooks_201/op_correl_time.pdf]

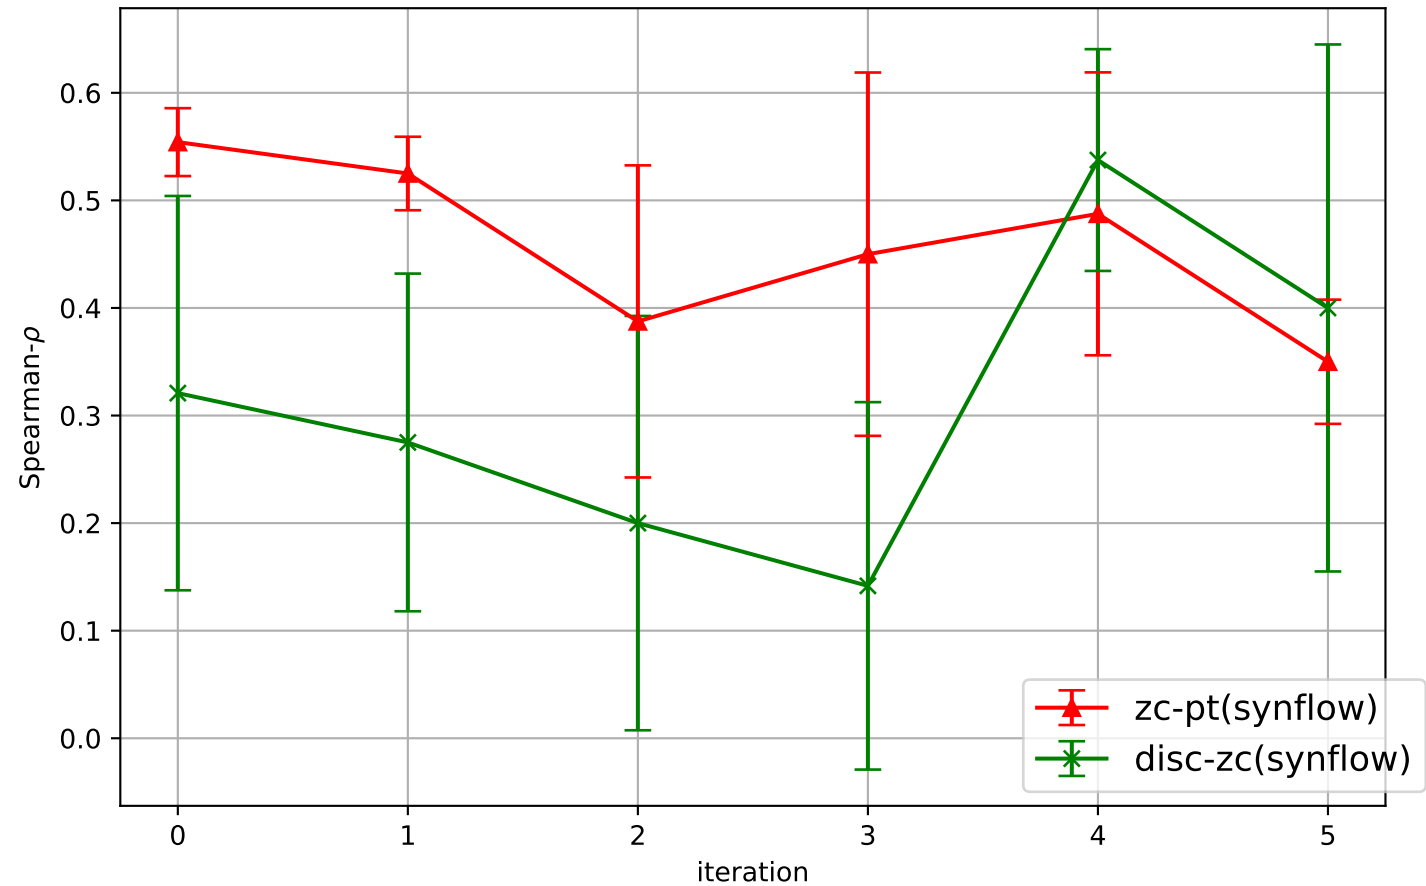

Supplement: supplementary_material [file op_correl_time_nwot.pdf › code/NASBench201/notebooks_201/op_correl_time_nwot.pdf]

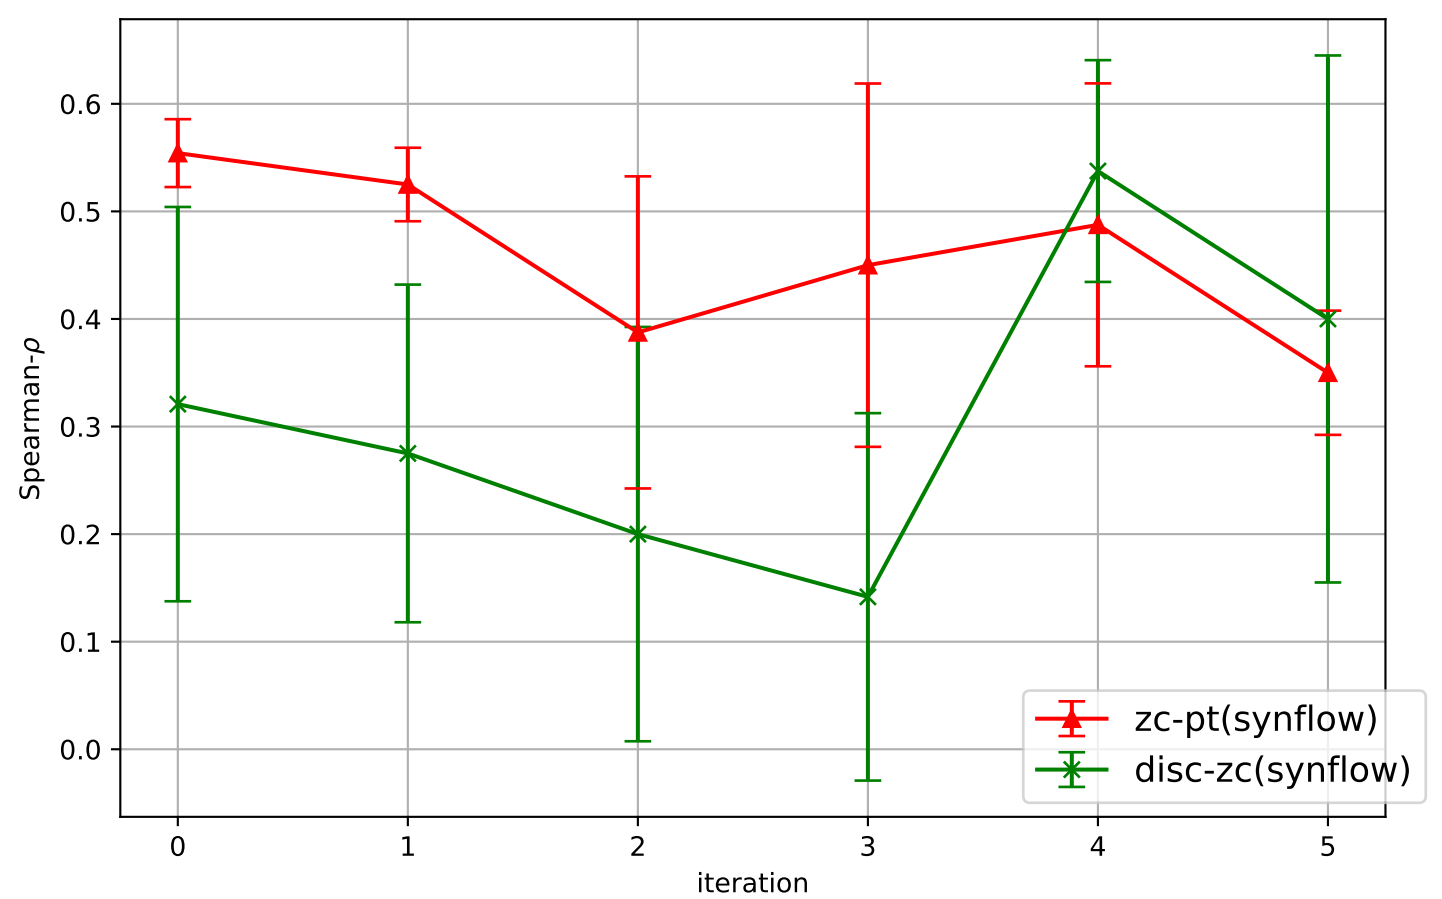

Supplement: supplementary_material [file op_correl_time_synflow.pdf › code/NASBench201/notebooks_201/op_correl_time_synflow.pdf]
